# Supplementary material for: Measuring the order parameter of vertically aligned nanorod assemblies
Source: Royal Society of Chemistry journal article supplement (doi:10.1039/d0nr08452b), 2021-01-01
Supplement: d0nr08452b1.pdf [file d0nr08452b1.pdf]

## Supporting Information

# Measuring the Order Parameter of Vertically Aligned Nanorods Assembly

Jeongmo Kim,<sup>a</sup> Khalid Lahlil,<sup>a</sup> Thierry Gacoin,<sup>\*a</sup> and Jongwook Kim<sup>\*a</sup>

*<sup>a</sup>Laboratoire de Physique de la Matière Condensée, CNRS, École Polytechnique,  
Institut Polytechnique de Paris, 91128 Palaiseau, France*

Corresponding Author:

thierry.gacoin@polytechnique.edu / jong-wook.kim@polytechnique.edu

## In-plane alignment of nanorods by electro-optical switching

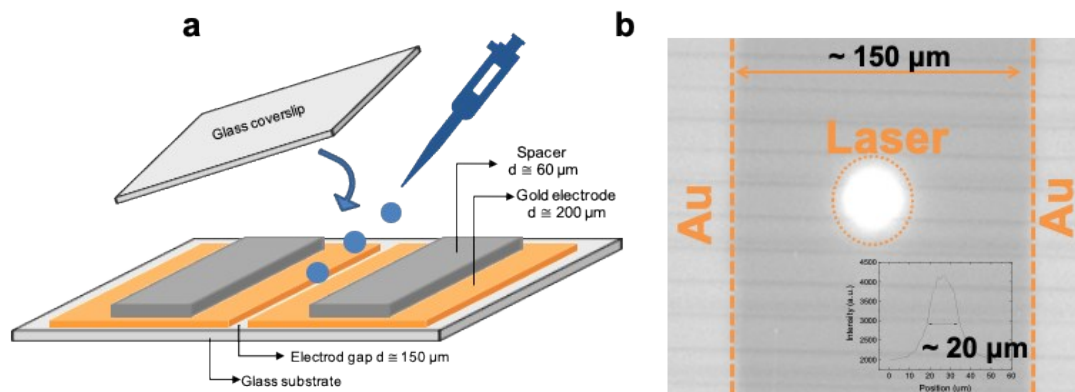

**Figure S1.** (a) Illustration of preparation of lab-made in-plane switching (IPS) electro-optical cell and switching experiment (b) CCD captured image of lab-made IPS electro-optical cell. Inset: intensity profile of laser excitation area with a full-width-half-max (FWHM) of  $\sim 20 \mu\text{m}$ .

**Figure S1a** shows the lab-made in-plane switching (IPS) cell. The cell has a gap of  $\sim 150 \mu\text{m}$  between Au electrodes on the glass substrate. Around  $20 \mu\text{L}$  of  $\text{NaYF}_4:\text{Eu}$  colloidal nanorods dispersed in ethylene glycol (EG) is deposited between electrodes and covered by a glass cover slip with the spacer of thickness of around  $60 \mu\text{m}$ . **Figure S1b** shows the CCD-captured image of lab-made IPS cell. The bright circle in the middle of electrodes is the position where the  $\text{NaYF}_4:\text{Eu}$  nanorods are excited by UV-laser ( $\lambda \sim 394 \text{ nm}$ ). As the E-field  $\vec{n}$  of IPS cell is transverse only at the middle of electrodes, it is important to collect PL signals at the middle of two electrodes from the smallest region. **Figure S1b-inset** shows the measured intensity profile of the excited area, showing around  $20 \mu\text{m}$  of full-width-half-max (FWHM).

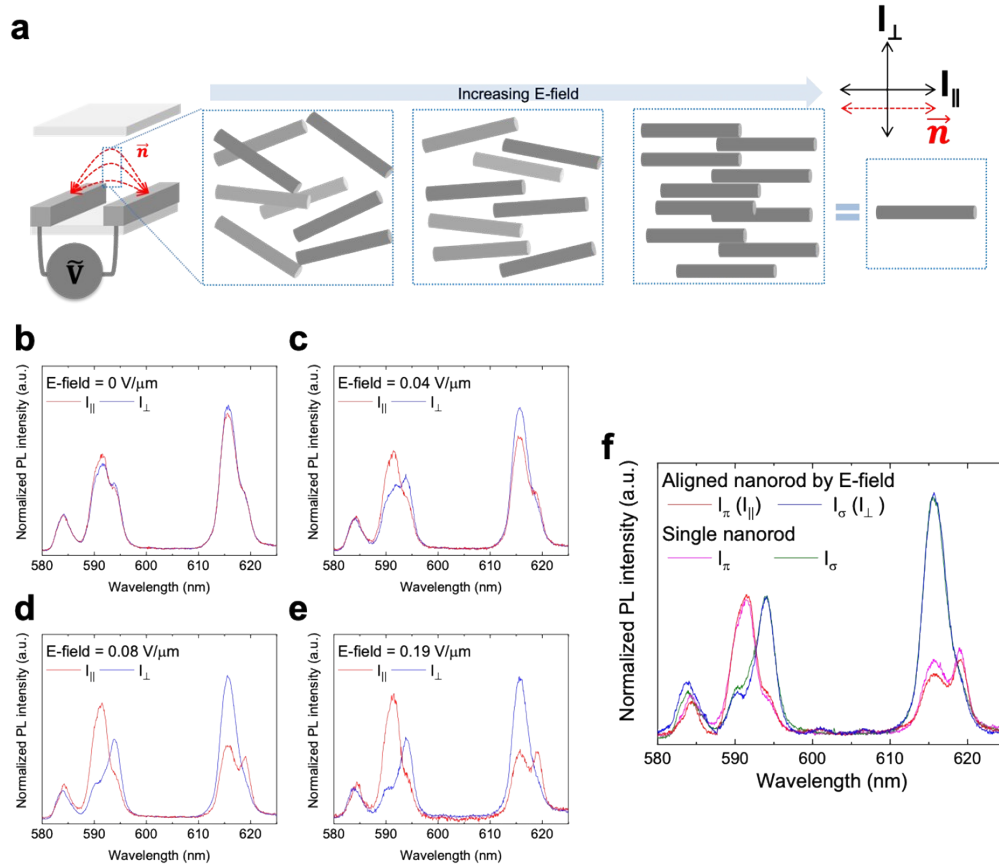

**Figure S2.** (a) Schematic illustration of IPS electro-optical (E/O) cell with aligning nanorods as increasing E-field. Red dashed line stands for the direction of E-field  $\vec{n}$ . At the middle of two electrodes, E-field direction  $\vec{n}$  is transverse where polarized photoluminescence (PL) spectra of aligned NaYF<sub>4</sub>:Eu nanorods are measured. Polarized photoluminescence spectra of orientation-controlled NaYF<sub>4</sub>:Eu nanorods measured at different E-field intensity of (b) 0 (c) 0.04 (d) 0.08 and (e) 0.19 V/μm ( $f = 1$  kHz) with the polarizer set to parallel ( $I_{||}$ , red line) and perpendicular ( $I_{\perp}$ , blue line) to the direction of E-field direction  $\vec{n}$  (f) Reference spectra ( $I_{\pi}$ ,  $I_{\sigma}$ ) obtained from aligned nanorods under the E-field (at saturated voltage,  $E \sim 0.47$  V/μm) and from the single nanorod.

Nanorods submitted in such in-plane E-field begin to align parallel to field direction  $\vec{n}$  and in-plane order parameter  $S$  increases as schematized in **Figure S2a**. When there is no applied E-field, measured spectra at two orthogonal polarization shows negligible changes as nanorods are randomly oriented (**Figure S2b**). Upon increasing E-field strength, observed line shape of PL signal is different when measured with a polarizer set to parallel ( $I_{||}$ ) and perpendicular ( $I_{\perp}$ ) to  $\vec{n}$  (**Figure S2c-e**). When E-field intensity is higher than  $\sim 0.47$  V/μm, line shape showed no longer changes. At this saturating E-field intensity, the line shape of  $\pi$  signal obtained from  $I_{||}$  (red line) and the  $\sigma$  signal obtained from  $I_{\perp}$  (blue line) is identical to those obtained from the single nanorod (magenta and olive line), indicating alignment of nanorods by E-field is close to perfect in-plane alignment ( $S \sim 1$ ) (**Figure S2f**).

### Line shape comparison of $I_{\pi} + I_{\sigma}$ and $I_{\pi+\sigma}$

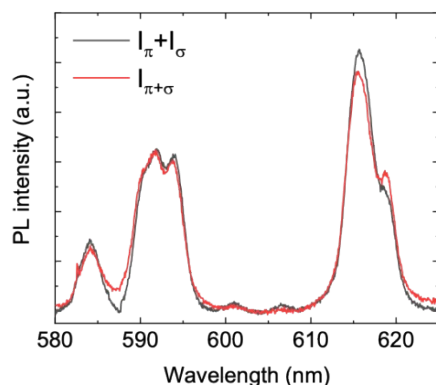

**Figure S3.** Sum of separately measured emission spectra of  $\pi$  and  $\sigma$  configuration ( $I_{\pi}+I_{\sigma}$ ) from the electrically aligned NaYF<sub>4</sub>:Eu nanorod assembly and the emission spectrum of randomly deposited NaYF<sub>4</sub>:Eu nanorods lying on the substrate ( $I_{\pi+\sigma}$ ).

### Photoluminescence signal of NaYF<sub>4</sub>:Eu nanorods as a function of relaxation time after the E-field turned off from saturating E-field

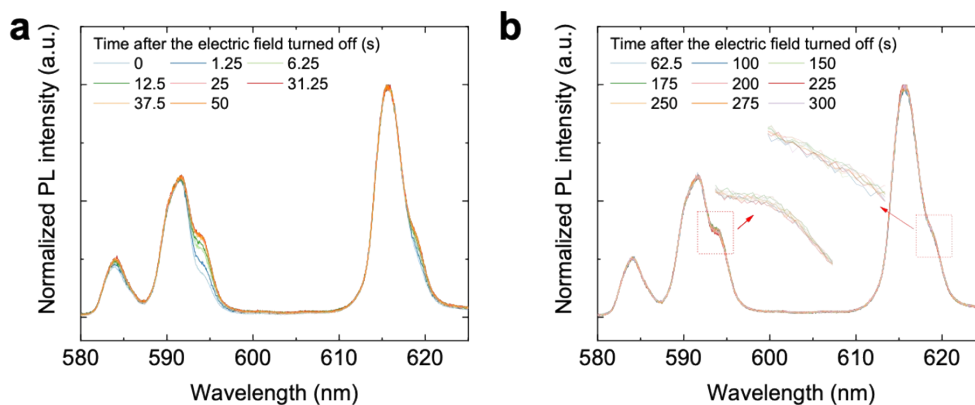

**Figure S4.** Photoluminescence spectra of NaYF<sub>4</sub>:Eu nanorods collected as a function of relaxation time after the E-field turned off from the saturating E-field. All spectra are normalized to the intensity at peak  $\lambda \sim 615$  nm.

## Simulated profile of homeotropic order parameter analysis

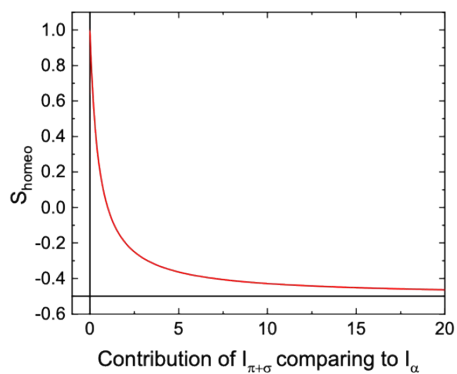

**Figure S5.** Simulated homeotropic order parameter  $S_{\text{homeo}}$  as a function of  $I_{\pi+\sigma}$  contribution comparing to  $I_{\alpha}$ . Simulation is made according to **Equation 5**.

## NaYF<sub>4</sub>:Eu nanorods characterization

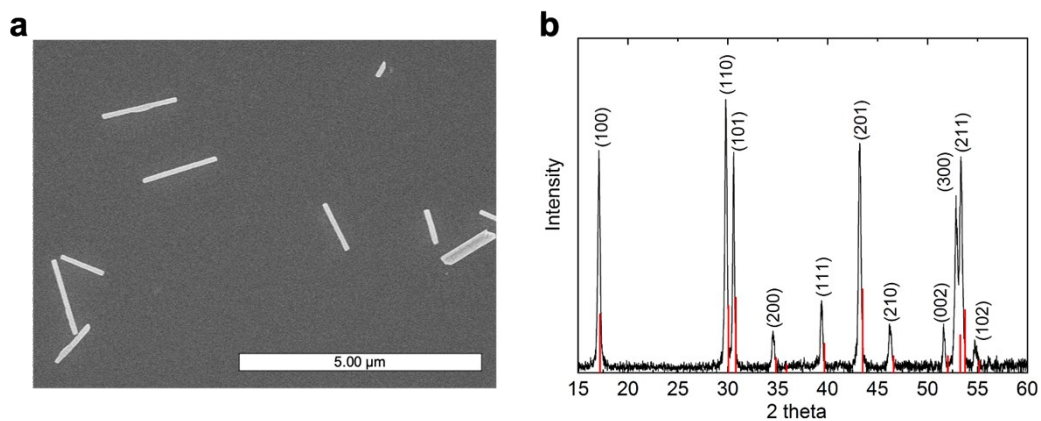

**Figure S6. (a)** Scanning electron microscopy (SEM) image of NaYF<sub>4</sub>:Eu nanorods. **(b)** X-ray diffraction (XRD) pattern of NaYF<sub>4</sub>:Eu nanorods. Reference pattern of hexagonal  $\beta$ -NaYF<sub>4</sub> (JCPDS 16-0334) is plotted in red line.
